# Supplementary material
Source: PubMed Central journal article supplement (PMC10592015)
Supplement: NIHMS1927964-supplement-2.pdf [file NIHMS1927964-supplement-2.pdf]

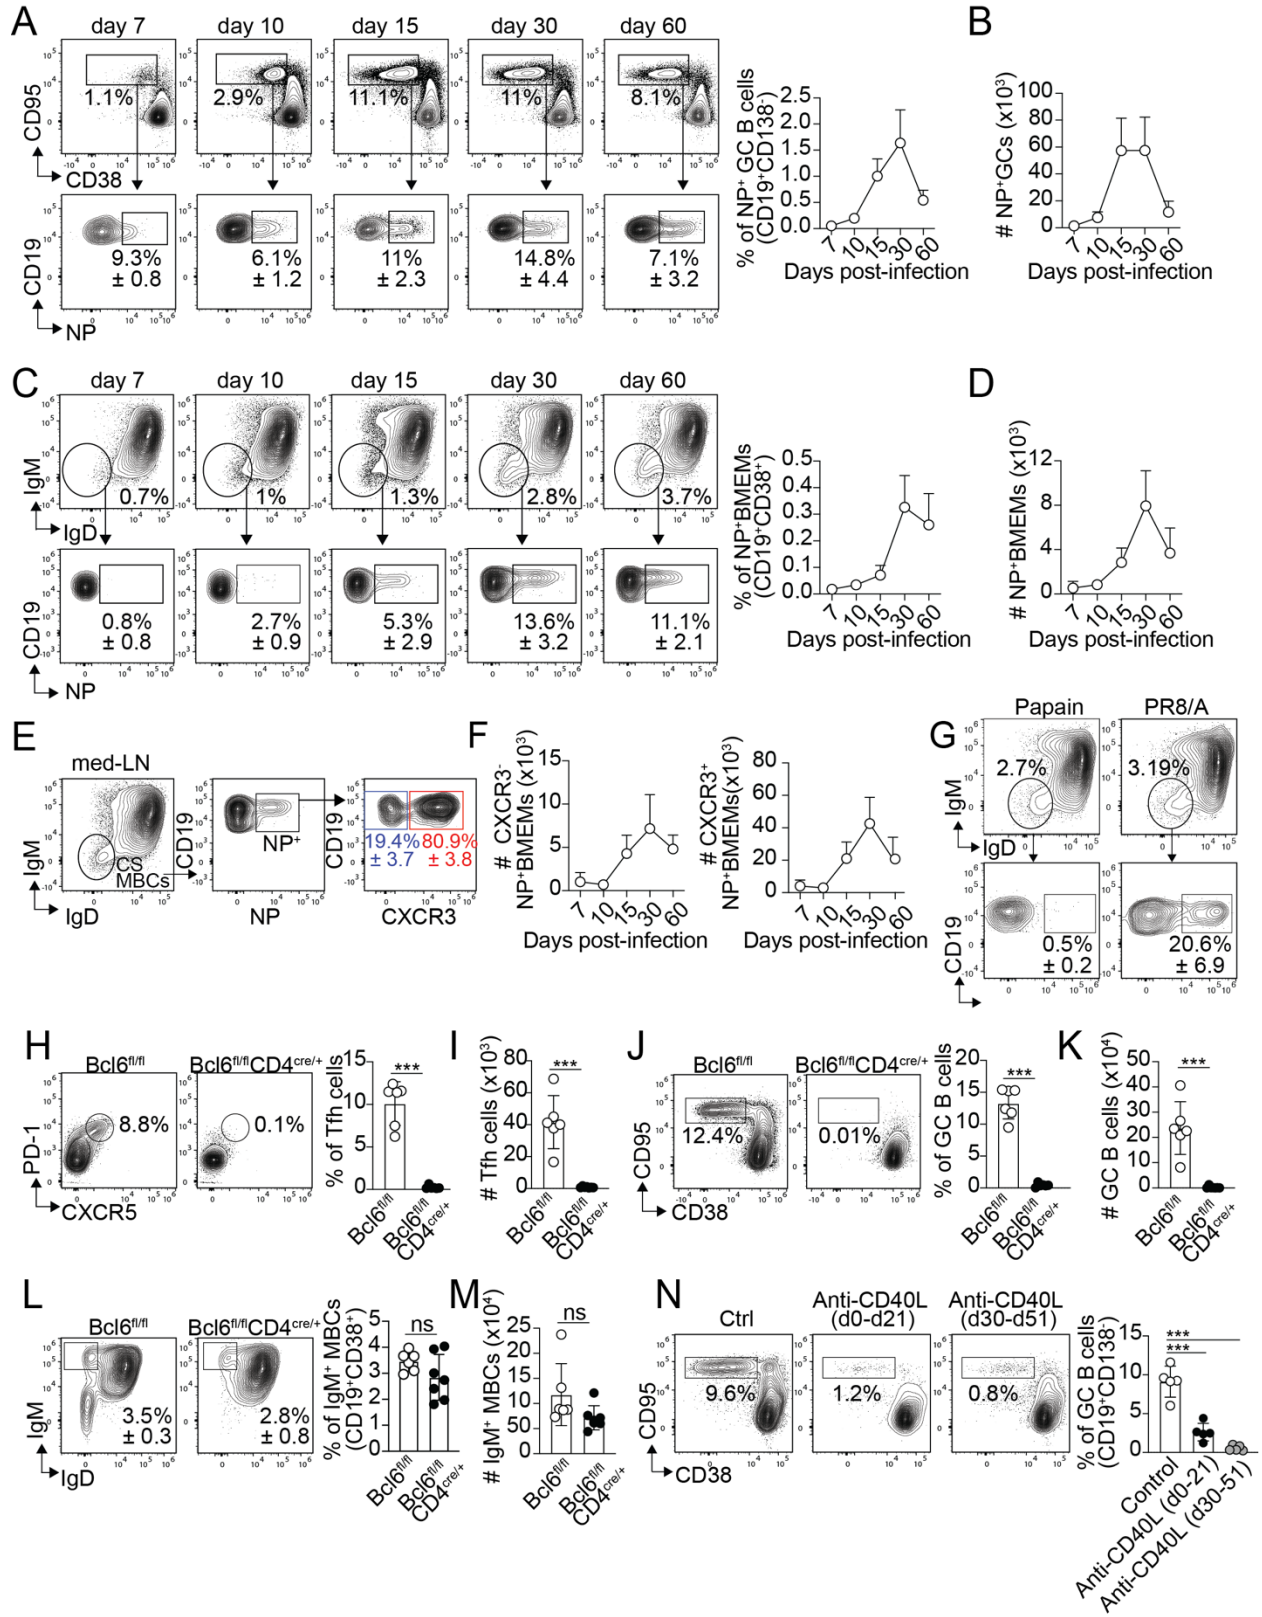

**Figure Supplementary 1. GC and memory B cell responses in the med-LN, related to Figure 1.** (A-F) B6 mice were infected with PR8, and cells from the med-LN were analyzed by flow cytometry at the indicated time points. Frequency (A) and number (B) of NP-specific GCs in the med-LN at the indicated time points. Representative plots gated on CD19<sup>+</sup>CD138<sup>-</sup> B cells are shown. Frequency (C) and number (D) of class-switched NP-specific memory B cells in the med-LN at the indicated time points. Representative plots gated on CD19<sup>+</sup>CD38<sup>+</sup>CD138<sup>-</sup> B cells are shown. (E) Expression of CXCR3 in class-switched NP-specific memory B cells in the med-LN. (F) Number CXCR3<sup>-</sup> and CXCR3<sup>+</sup> class-switched NP-specific memory B cells in the med-LN at the indicated time points. All data are shown as the mean  $\pm$  SD (n=5 mice/time point). Data are representative of four independent experiments. (G) B6 mice were infected with PR8 or intranasally sensitized with 100 $\mu$ g of papain. Cells from the lungs were analyzed by flow cytometry on day 30. The frequencies of NP-specific B cells within the class-switched memory B cell compartment are shown. Data are shown as the mean  $\pm$  SD (n=5 mice/time point). Data are representative of two independent experiments. (H-M) Control (B6.Bcl6<sup>fl/fl</sup>) and Tfh-deficient (B6.Bcl6<sup>fl/fl</sup>/CD4<sup>cre/+</sup>) mice were infected with PR8 and cells from the were analyzed by flow cytometry on day 30. Frequency (H) and number (I) of PD-1<sup>hi</sup>CXCR5<sup>hi</sup> (Tfh cells) within the CD4<sup>+</sup> T cells in the med-LN. Frequency (J) and number (K) of GC B cells within the CD19<sup>+</sup>CD138<sup>-</sup> B cells in the med-LN. Frequency (L) and number (M) IgM<sup>+</sup> memory B cells in the lungs of control and Tfh-deficient on day 30 after infection. Representative plots are shown. Data are shown as the mean  $\pm$  SD (n=5 mice/time point). P value was determined using a two-tailed Student's t-test. Data are representative of three independent experiments. (N) B6 mice were infected with PR8 and treated with 250  $\mu$ g of anti-CD40L (MR1) antibody between day 0 and day 21 or between day 30 and day 51. In each treated group, mice receive 3 injections administered

one week apart. The frequency of GC B cells in the med-LN on day 55 after infection is shown. Representative plots are shown. Data are shown as the mean  $\pm$  SD (n=5 mice/time point). P values were determined by one-way ANOVA with a post-hoc Kruskal–Wallis comparison test. Data are representative of three independent experiments.

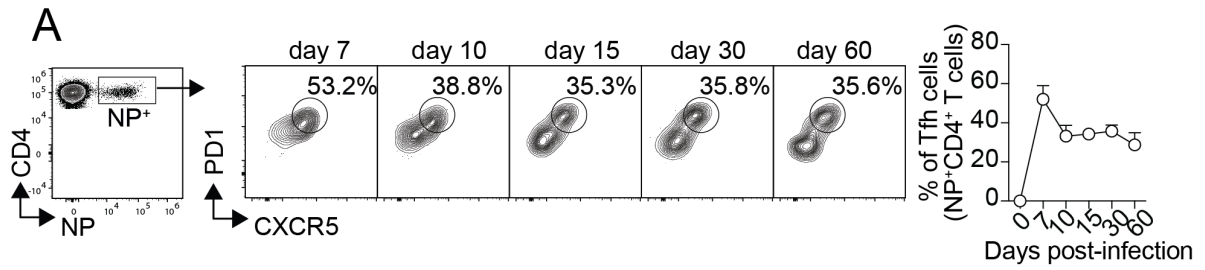

**Figure Supplementary 2. NP-specific Tfh cell response, related to Figure 2.** B6 mice were infected with PR8 and cells from the med-LN were analyzed by flow cytometry at the indicated time points. The frequency of PD1<sup>hi</sup>CXCR5<sup>hi</sup> cells within the NP-specific CD4<sup>+</sup> T cell population is shown at the indicated time points. Representative plots are shown. Data are shown as the mean  $\pm$  SD (n=5 mice/time point). Data are representative of three independent experiments.

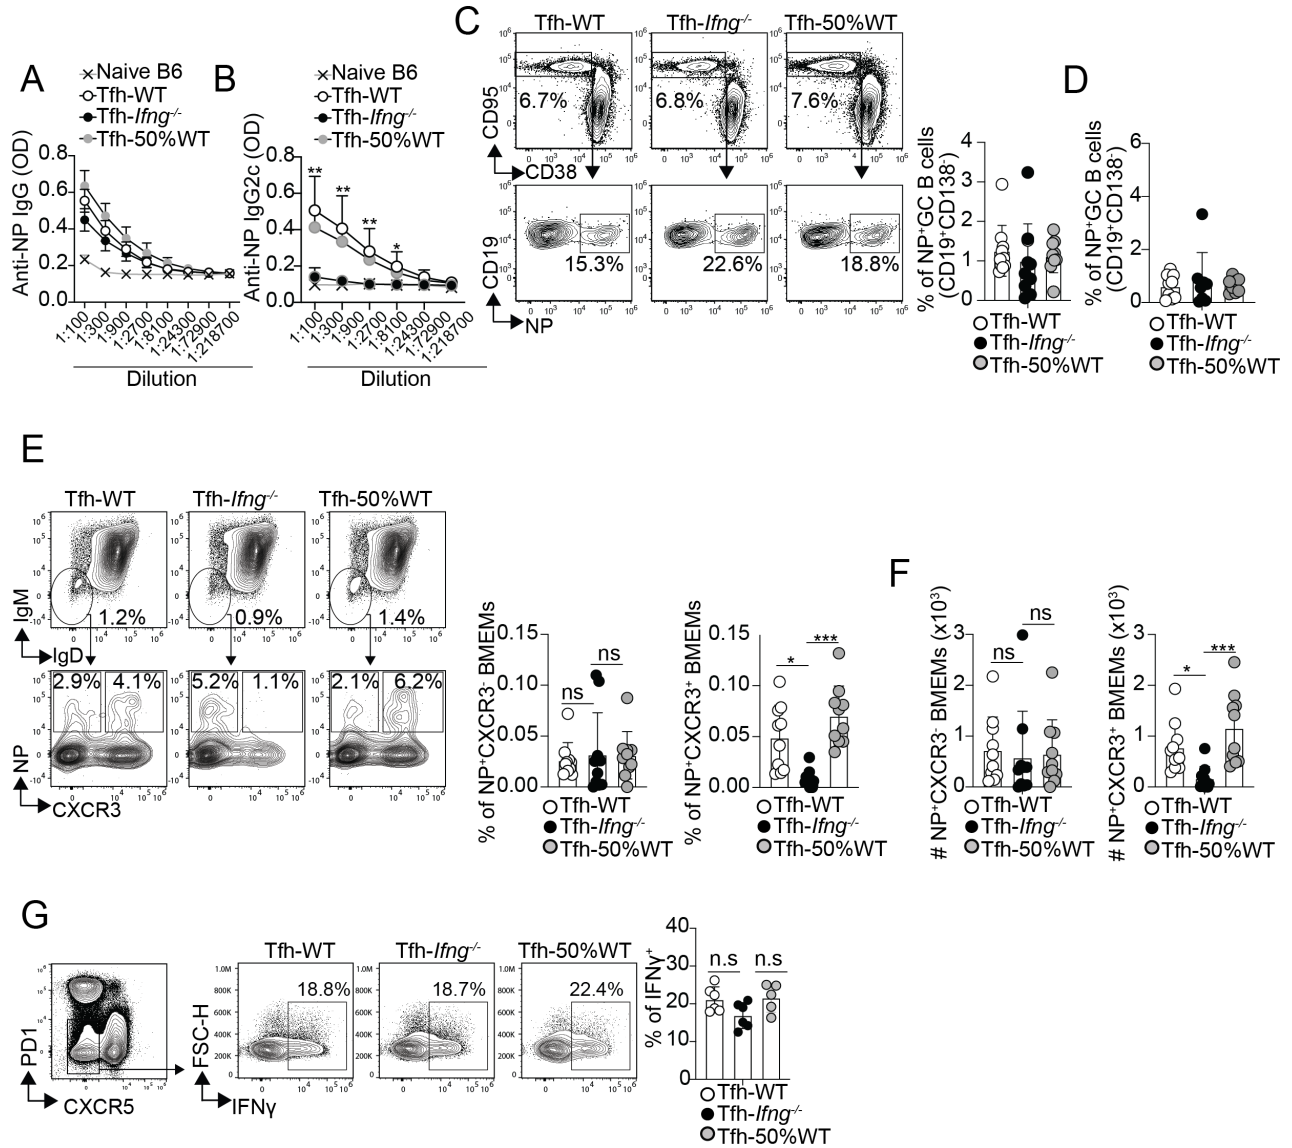

**Figure Supplementary 3. Normal GC B cell responses in the Tfh-*Ifng*<sup>-/-</sup> chimeras, related to Figure 3. (A-H)** Irradiated *Tcrb*<sup>-/-</sup>*Tcrd*<sup>-/-</sup> mice were reconstituted with the indicated BM mixtures to generate Tfh-WT, Tfh-*Ifng*<sup>-/-</sup>, and Tfh-50%WT chimeras. Eight weeks after reconstitution, the chimeric mice were infected with PR8. (A-B) Serum was obtained at day 30 and NP-specific IgG (A) and IgG2c (B) Abs were measured by ELISA. Data are representative of three independent experiments. (n=5 mice/group). All data are shown as the mean  $\pm$  SD. P values were determined

by one-way ANOVA with a post-hoc Kruskal–Wallis comparison test. **(C)** Frequency of NP-specific GC B cells within the CD19<sup>+</sup> B cells in the med-LN **(C)** on day 30 after infection. Representative plots gated on CD19<sup>+</sup>CD138<sup>-</sup> B cells are shown. **(D)** Frequency of class-switched NP-specific GC B cells within the CD19<sup>+</sup> B cells in the lung on day 60 after infection. Data were pooled from two independent experiments (n=10 mice/group). Data are representative of four independent experiments. **(E-F)** Frequency **(E)** and number **(F)** of CXCR3<sup>+</sup> and CXCR3<sup>-</sup> class-switched NP-specific memory B cells in the med-LN on day 60 after infection. Representative plots gated on CD19<sup>+</sup>CD38<sup>+</sup>CD138<sup>-</sup> B cells are shown are shown. Data were pooled from two independent experiments (n=10 mice/group). Data are representative of four independent experiments. All data are shown as the mean ± SD. P values were determined by one-way ANOVA with a post-hoc Kruskal–Wallis comparison test. **(G)** The chimeric mice were infected with PR8 and challenged with X31 on day 30. The frequencies of IFN $\gamma$ <sup>+</sup> cells within CD4<sup>-</sup> T cells in the med-LN on day 6 after rechallenge are shown. Representative plots are shown. Data are representative of two independent experiments. Data are shown as the mean ± SD (n=5-6 mice). P values were determined by one-way ANOVA with a post-hoc Kruskal–Wallis comparison test.

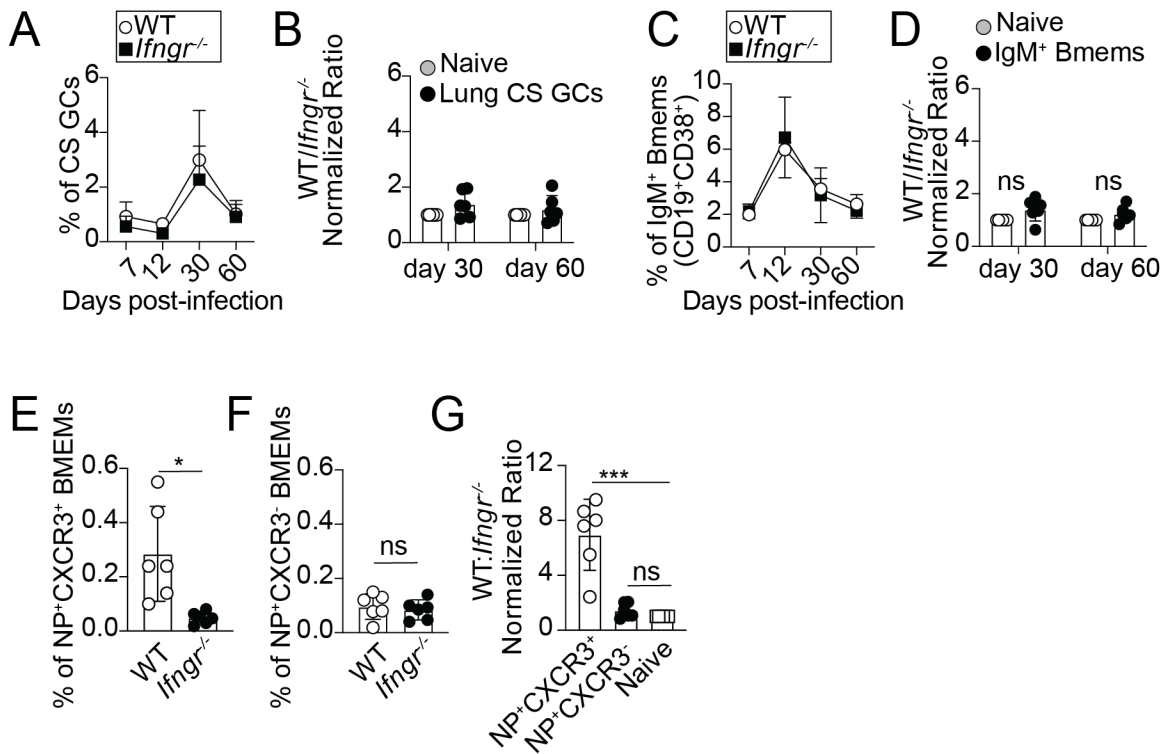

**Figure Supplementary 4. Intrinsic IFN $\gamma$  signaling is dispensable for CXCR3<sup>-</sup> class-switched NP-specific memory B cells in the med-LN, related to Figure 4.** (A-E) CD45.1<sup>+</sup> B6 mice were irradiated and reconstituted with a 50:50 mix of BM from CD45.1<sup>+</sup> B6 and CD45.2<sup>+</sup> *IfngR1*<sup>-/-</sup> donors. Eight weeks later, reconstituted mice were infected with PR8 and B cells were analyzed at the indicated time points. (A) Frequency of class-switched GC B cells within the CD45.1<sup>+</sup> B6 and CD45.2<sup>+</sup> *IfngR1*<sup>-/-</sup> compartments in the lungs. Data in the graph are shown as the mean  $\pm$  SD (n=5-6 mice). P values were determined using a two-tailed Student's t-test. (B) Ratio of B6 to *IfngR1*<sup>-/-</sup> naïve B cells (naïve) and class-switched GC B cells from the lungs. Data in the graph are shown as the mean  $\pm$  SD (n=5-6 mice). (C) Frequency of lung IgM<sup>+</sup> memory B cells within the CD45.1<sup>+</sup> B6 and CD45.2<sup>+</sup> *IfngR1*<sup>-/-</sup> compartments in the lungs. Data in the graph are shown as the mean  $\pm$  SD (n=5-6 mice). P values were determined using a two-tailed Student's t-test. (D)

Ratio of B6 to *IfngR1*<sup>-/-</sup> naïve B cells (naïve) and IgM<sup>+</sup> memory B cells from the lungs. Data in the graph are shown as the mean  $\pm$  SD (n=5-6 mice). P values were determined by one-way ANOVA with a post-hoc Kruskal–Wallis comparison test. **(E-G)** Frequency of class-switched CXCR3<sup>+</sup> **(E)** and CXCR3<sup>-</sup> **(F)** class-switched NP-specific memory B cells within the CD45.1<sup>+</sup> B6 and CD45.2<sup>+</sup> *IfngR1*<sup>-/-</sup> compartments in the med-LN. Data in the graph are shown as the mean  $\pm$  SD (n=5-6 mice). P values were determined using a two-tailed Student's t-test. **(G)** Ratio of B6 to *IfngR1*<sup>-/-</sup> naïve B cells (naïve) and CXCR3<sup>+</sup> and CXCR3<sup>-</sup> class-switched NP-specific memory B cells. Data in the graph are shown as the mean  $\pm$  SD (n=5-6 mice). values were determined by one-way ANOVA with a post-hoc Kruskal–Wallis comparison test. Data are representative of three independent experiments.



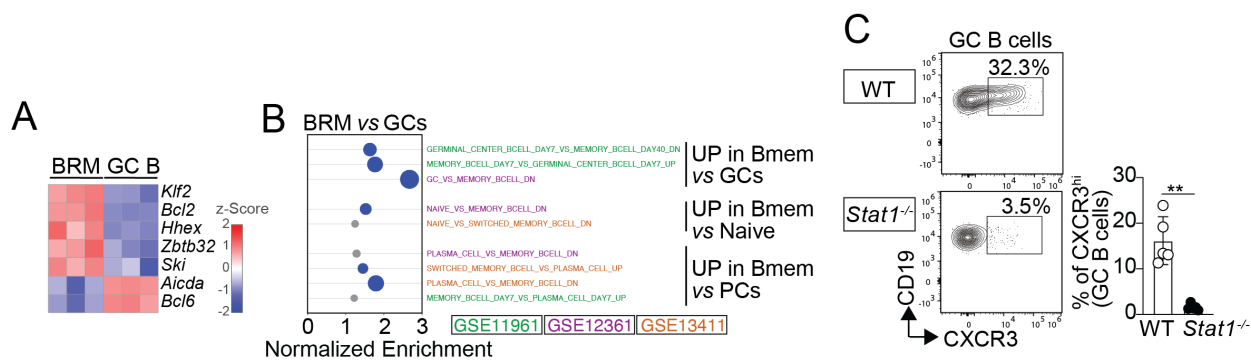

**Figure Supplementary 5. Lung-BRMs are bona fide memory B cells, related to Figure 5. (A-B)** B6 mice were infected with PR8. Class-switched GC B cells from the med-LN and paired lung-BRMs were sorted on day 30 after infection and RNA-seq was performed. **(A)** Heatmap showing the z-score of expression of key GC and memory B cell genes in BRM and GC B cells. **(B)** Gene set enrichment analysis (GSEA) for the indicated gene expression signatures of memory B cells in BRM vs. GC B cells. Circles size represents the Normalized enrichment score (NES). Blue color indicates FDR <0.05. Three replicates for each cell type were obtained from three independent experiments. Genes for GSEA were ranked by  $-\log_{10}(\text{p-value})$  times the sign of the fold change for the paired BRM vs. GC B cells comparison. **(C)** WT/*Stat1*<sup>-/-</sup> BM chimeras were infected with PR8. The frequency of CXCR3<sup>hi</sup> cells within the WT and *Stat1*<sup>-/-</sup> GC B cells were calculated at the indicated time points. Representative plots gated from day 12 shown are shown. Data are shown as the mean  $\pm$  SD (n=5-6 mice/time point). Data are representative of two independent experiments. P values were determined using a two-tailed Student's t-test.

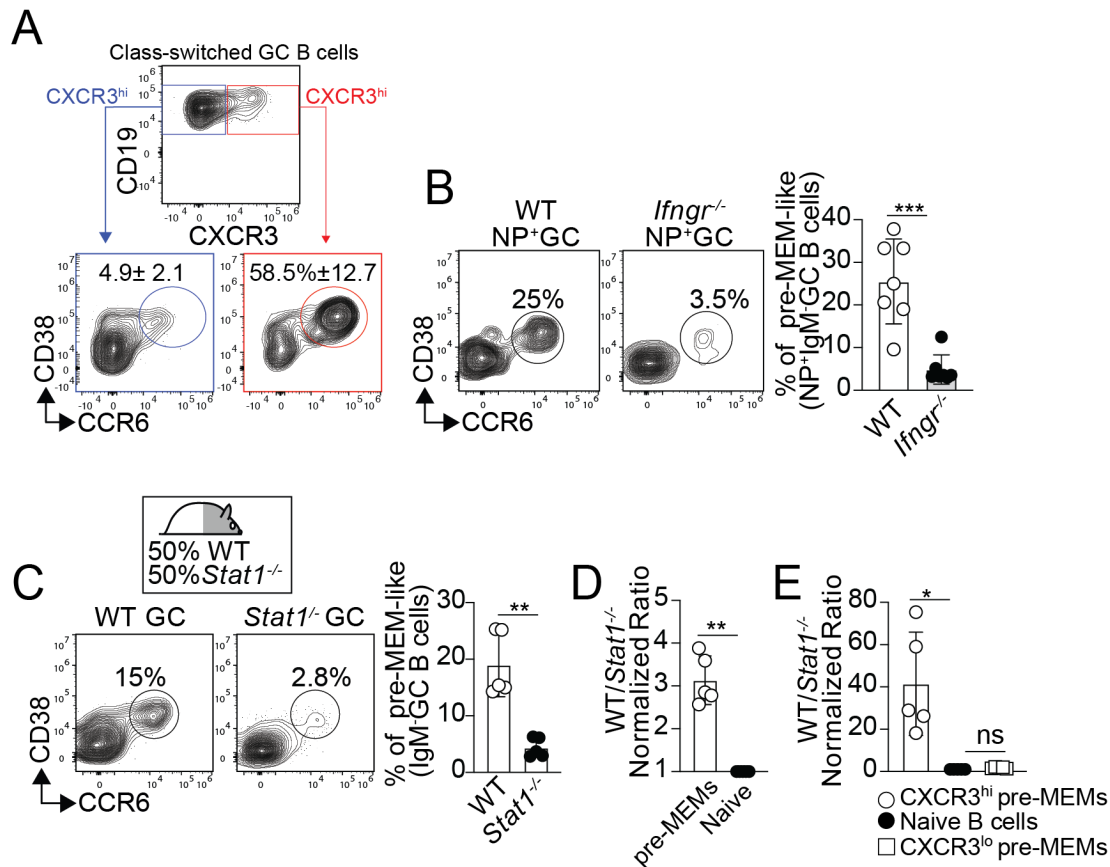

**Figure Supplementary 6. Intrinsic STAT1 signaling is required for the differentiation of**

**CXCR3<sup>+</sup>pre-MEMs**, related to Figure 6. (A) B6 were infected with PR8 and GC B cells from the med-LN were analyzed by flow cytometry on day 10 after infection. The frequencies of pre-MEMs within the CXCR3<sup>lo</sup> and CXCR3<sup>hi</sup> GC B cells are shown. Representative plots gated on CD19<sup>+</sup> CD138<sup>-</sup> IgD<sup>-</sup> IgM<sup>+</sup> FAS<sup>+</sup> B cells. All data are shown as the mean ± SD (n=5 mice/time point). Data are representative of four independent experiments. (B) WT/*IfngR1*<sup>-/-</sup> BM chimeras were infected with PR8 and cells from the med-LN were analyzed on day 10. The frequencies of pre-MEMs within the B6 and *IfngR1*<sup>-/-</sup> NP-specific GC B cells in the med-LN are shown. Data in the graph are shown as the mean ± SD (n=7 mice). P values were determined using a two-tailed Student's t-test. Data are representative of two independent experiments. (C-E) WT/*Stat1*<sup>-/-</sup> BM chimeras were infected with PR8 and cells from the med-LN were analyzed on day 10. (C)

(D) WT/*Stat1*<sup>-/-</sup> Normalized Ratio. (E) WT/*Stat1*<sup>-/-</sup> Normalized Ratio. WT/*Stat1*<sup>-/-</sup> chimeras were infected with PR8 and cells from the med-LN were analyzed on day 10. Data in the graph are shown as the mean ± SD (n=7 mice). P values were determined using a two-tailed Student's t-test. Data are representative of two independent experiments. (C-E) WT/*Stat1*<sup>-/-</sup> BM chimeras were infected with PR8 and cells from the med-LN were analyzed on day 10. (C)

(D) WT/*Stat1*<sup>-/-</sup> Normalized Ratio. (E) WT/*Stat1*<sup>-/-</sup> Normalized Ratio. WT/*Stat1*<sup>-/-</sup> chimeras were infected with PR8 and cells from the med-LN were analyzed on day 10. Data in the graph are shown as the mean ± SD (n=7 mice). P values were determined using a two-tailed Student's t-test. Data are representative of two independent experiments. (C-E) WT/*Stat1*<sup>-/-</sup> BM chimeras were infected with PR8 and cells from the med-LN were analyzed on day 10. (C)

Frequency of pre-MEMs within the B6 and *Stat1*<sup>-/-</sup> GC B cells in the med-LN. **(D)** Ratio of B6 to *Stat1*<sup>-/-</sup> pre-MEMs. **(E)** Ratio of B6 to *Stat1*<sup>-/-</sup> CXCR3<sup>+</sup> and CXCR3<sup>-</sup> pre-MEMs. Data in the graph are shown as the mean  $\pm$  SD (n=5 mice). P values were determined using a two-tailed Student's t-test. Data are representative of two independent experiments.

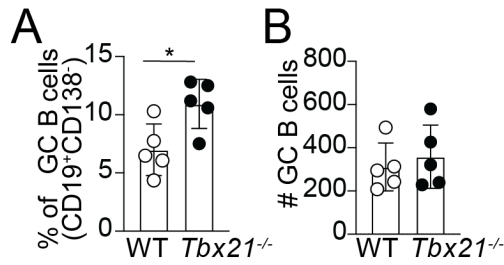

**Figure Supplementary 7. GC B cells normally differentiate in the absence of T-bet, related to Figure 7.** B6 and *Tbx21*<sup>-/-</sup> (T-bet deficient) mice were infected with PR8 and the frequency (**A**) and number (**B**) of GC B cells were calculated in the med-LN on day 10 after infection. Data in the graph are shown as the mean  $\pm$  SD (n=5mice). P values were determined using a two-tailed Student's t-test. Data are representative of two independent experiments.
